# Supplementary material for: A CRM-Inclusive ypT Staging System Enhances Survival Prediction in Rectal Cancer Post-Neoadjuvant Therapy
Source: Research Square preprint supplement (doi:10.21203/rs.3.rs-7108587/v1), 2025-08-06
Supplement: Supplementary file 1 [file 6df05795544caf046568bd3c.docx]

**Supplement Table 1.** Survival rates of patients with rectal cancer according to different ypT and CRM status.

|  | **Survival** | |  | **Survival** | |
| --- | --- | --- | --- | --- | --- |
| ***p*T** | **Total** | **N (%)** | ***p*T with CRM** | **Total** | **N (%)** |
| *p*T0 | 756 | 666 (88.10) | *p*T0 |  |  |
|  |  |  | CRM(-) | 755 | 665 (88.08) |
|  |  |  | CRM(+) | 1 | 1 (100.00) |
| *p*T1 | 204 | 187 (91.67) | *p*T1 |  |  |
|  |  |  | CRM(-) | 235 | 215 (91.49) |
|  |  |  | CRM(+) | 1 | 1 (100.00) |
| *p*T2 | 1,037 | 876 (84.47) | *p*T2 |  |  |
|  |  |  | CRM(-) | 1,035 | 875 (84.54) |
|  |  |  | CRM(+) | 2 | 1 (50.00) |
| *p*T3 | 2,119 | 1,521 (71.78) | *p*T3 |  |  |
|  |  |  | CRM(-) | 1,987 | 1,460 (73.48) |
|  |  |  | CRM(+) | 132 | 61 (46.21) |
| *p*T4 | 194 | 94 (48.45) | *p*T4 |  |  |
|  |  |  | CRM(-) | 121 | 64 (52.89) |
|  |  |  | CRM(+) | 73 | 30 (41.10) |

**Supplement Figure 1.** The ROC between ypT and new category pT in rectal cancer patients treated with neoadjuvant chemoradiotherapy and surgery.
